# Supplementary material
Source: publisher figshare collection journal article supplement (https://sage.figshare.com/ndownloader/files/12454529)
Supplement: Supplementary file 1 [file 12454529]

## (A) Day 21

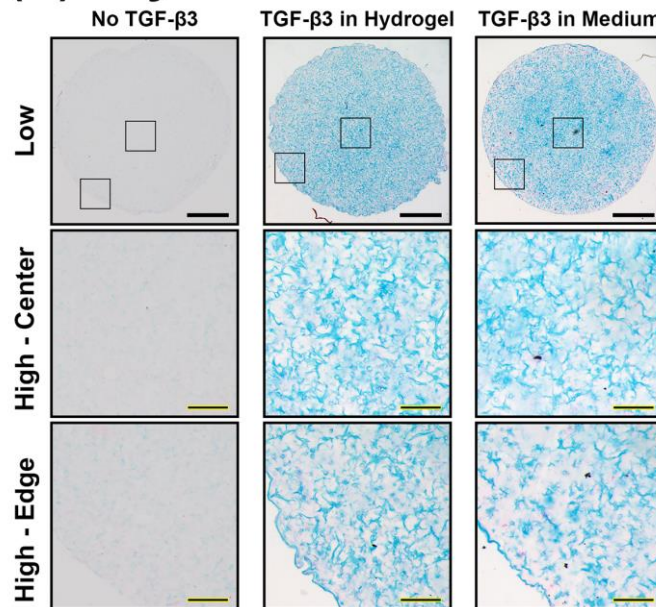

## (B) Day 42

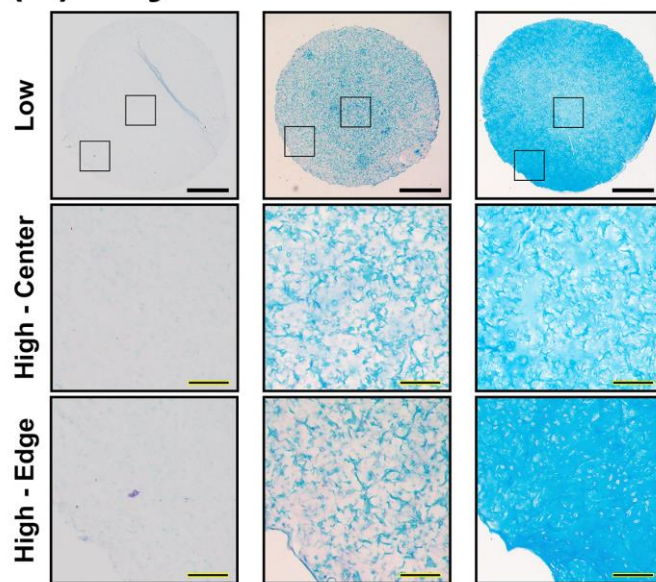

**Appendix Figure A1. Histological assessment of chondrogenesis in ASC-seeded hydrogel cultured for 21 and 42 days.** Alcian blue staining demonstrate that the presence of TGF- $\beta$ 3, either preloaded in the hydrogel or as a culture medium supplement, is required for ASC chondrogenesis. Low magnification, scale bar = 1 mm; High magnification, scale bar = 200  $\mu$ m. Block boxes indicate regions of higher magnification in hydrogel center and edge.
